# Supplementary material for: Dipyrone-induced inappropriate antidiuretic hormone secretion: a case report
Source: Preprints.org preprint supplement (doi:10.20944/preprints202406.1567.v1), 2024-06-24
Supplement: Supplementary file 1 [file supplementary]

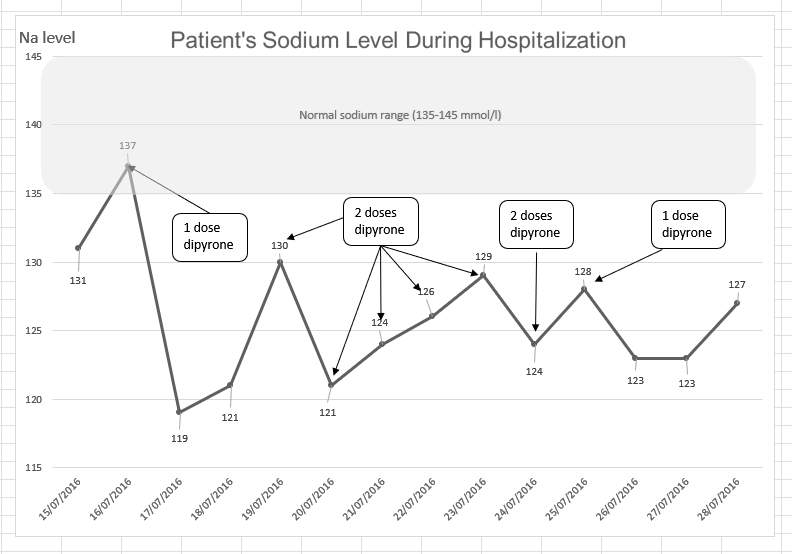


Figure 1: Patient’s sodium levels during his hospitalization per date.

.


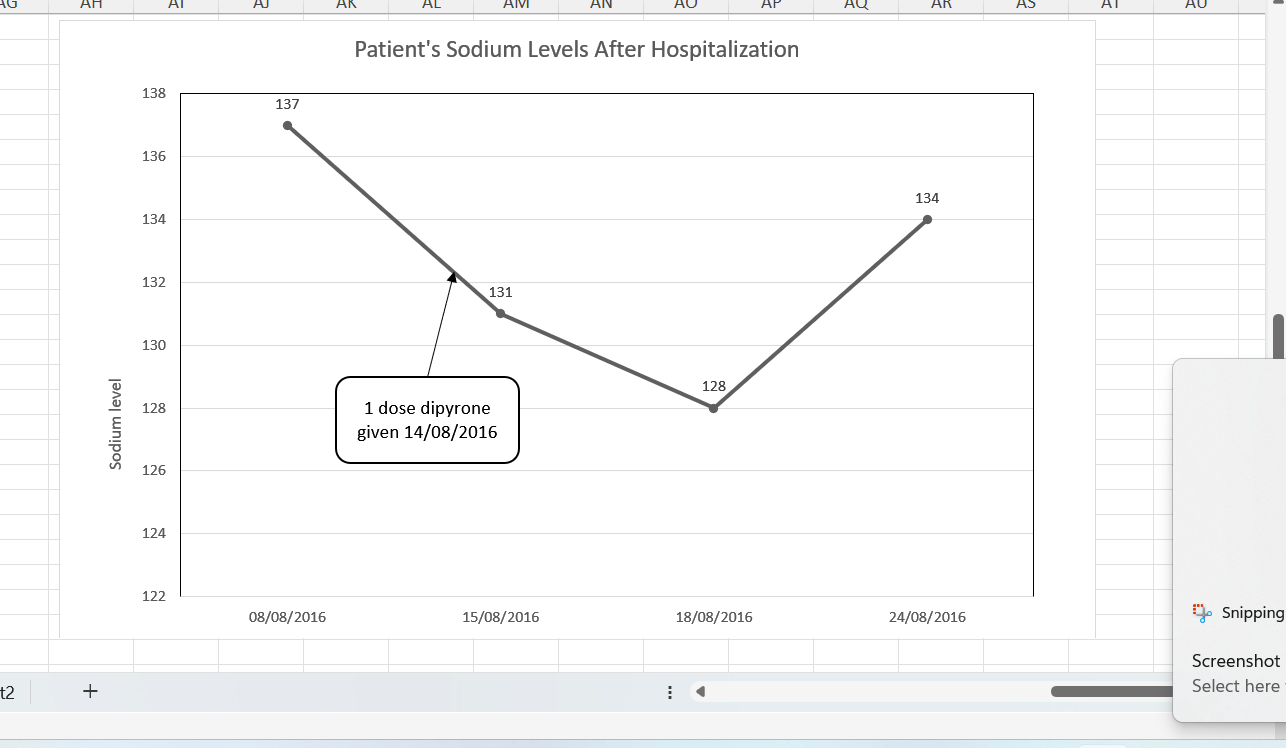


Figure 2: Dipyrone challenge test: Patient's sodium levels after hospitalization; the red arrow indicates one dose of dipyrone. Sodium levels were measured one day after the dose and day three days after the dose.
